# Supplementary material for: Unprecedented Ag–Cu2O composited mesocrystals with efficient charge separation and transfer as well as visible light harvesting for enhanced photocatalytic activity
Source: Royal Society of Chemistry journal article supplement (doi:10.1039/d1nr02306c), 2021-01-01
Supplement: d1nr02306c1.pdf [file d1nr02306c1.pdf]

***Supporting Information***

**Unprecedented Ag-Cu<sub>2</sub>O composited mesocrystals with efficient charge separation and transfer as well as visible light harvesting for enhanced photocatalytic activity**

**Shaodong Sun\*, Xiaochuan Zhang, Xiaojing Yu, Jie Cui, Man Yang, Qing Yang,  
Peng Xiao and Shuhua Liang\***

*Engineering Research Center of Conducting Materials and Composite Technology, Ministry of Education; Shaanxi Engineering Research Centers of Metal-Based Heterogeneous Materials and Advanced Manufacturing Technology; Shaanxi Province Key Laboratory for Electrical Materials and Infiltration Technology; School of Materials Science and Engineering, Xi'an University of Technology, Xi'an 710048, Shaanxi, People's Republic of China.*

**Email:** sdsun@xaut.edu.cn (S. D. Sun); liangsh@xaut.edu.cn (S. H. Liang).

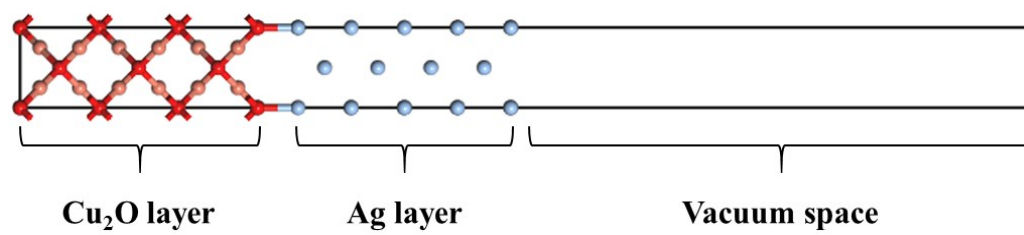

**Figure S1.** Periodic slab model of the  $\text{Cu}_2\text{O}$ -Ag interface

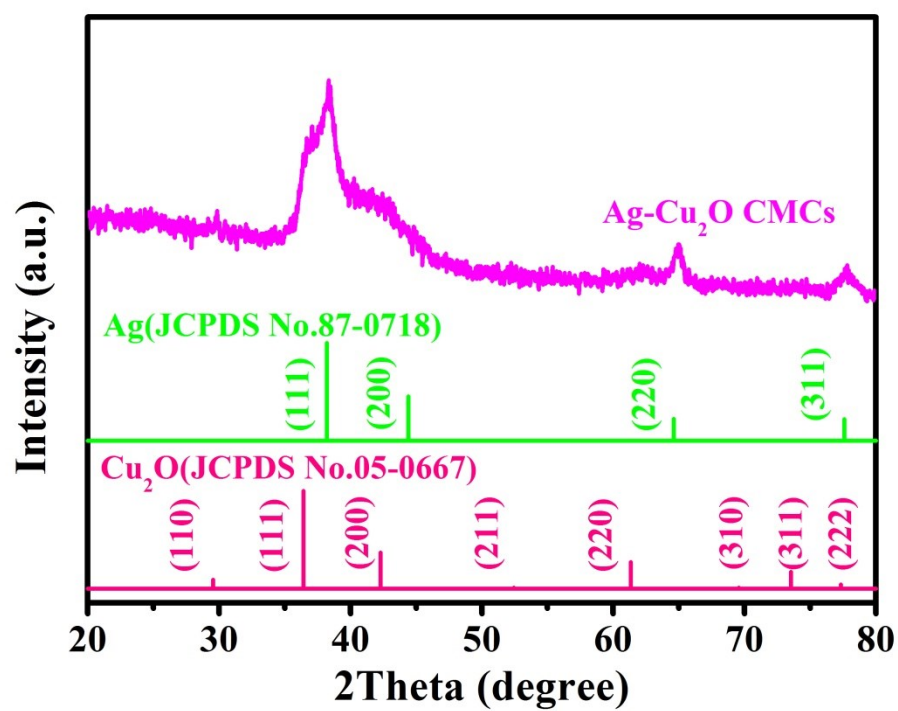

**Figure S2.** XRD pattern of the as-synthesized plate-like Ag-Cu<sub>2</sub>O nanocomposite mesocrystals.

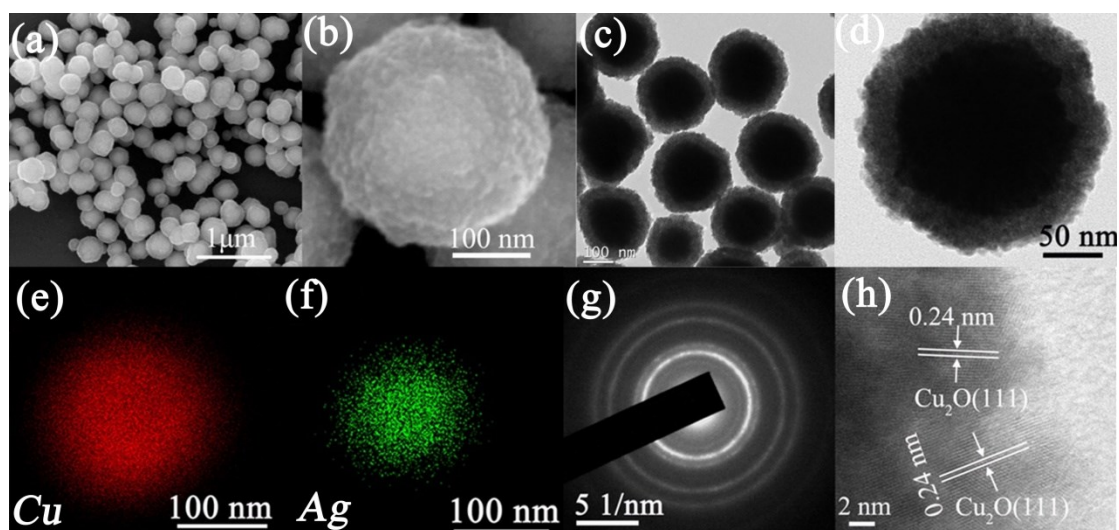

**Figure S3.** Microstructure characterizations of Ag@Cu<sub>2</sub>O nanospheres. (a) Low-magnification SEM image; (b) High-magnification SEM image; (c) Low-magnification TEM image; (d) High-magnification TEM image; (e) and (f) Element mapping results of Cu and Ag species, respectively; (g) SAED pattern obtained from the nanosphere as shown in Figure S3d; (h) HRTEM image obtained from the edge of the nanosphere as shown in Figure S3d.

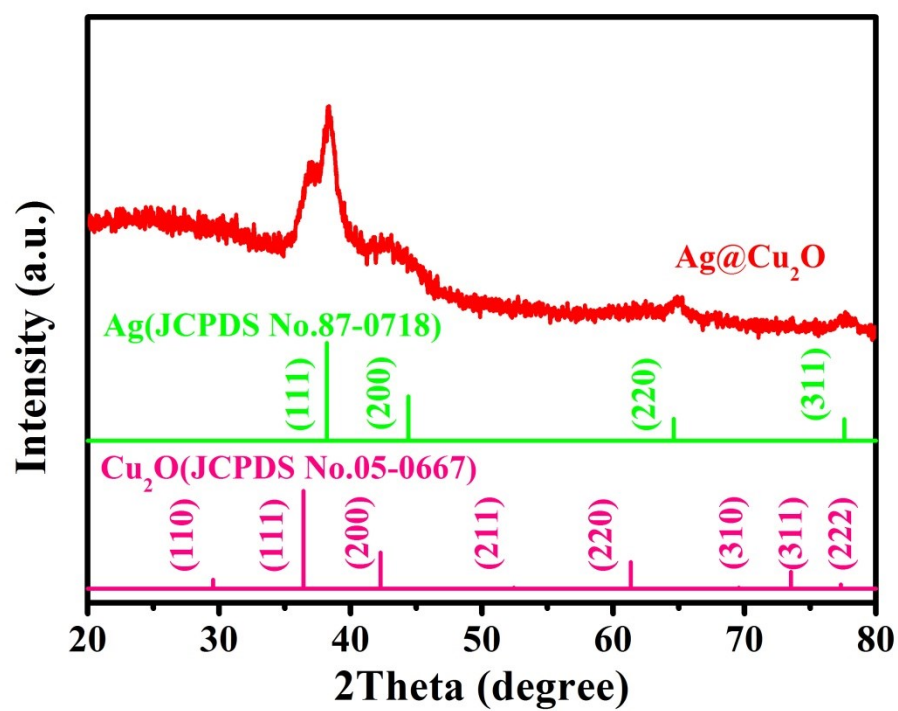

**Figure S4.** XRD pattern of the core-shell Ag@Cu<sub>2</sub>O nanospheres as shown in Figure S3.

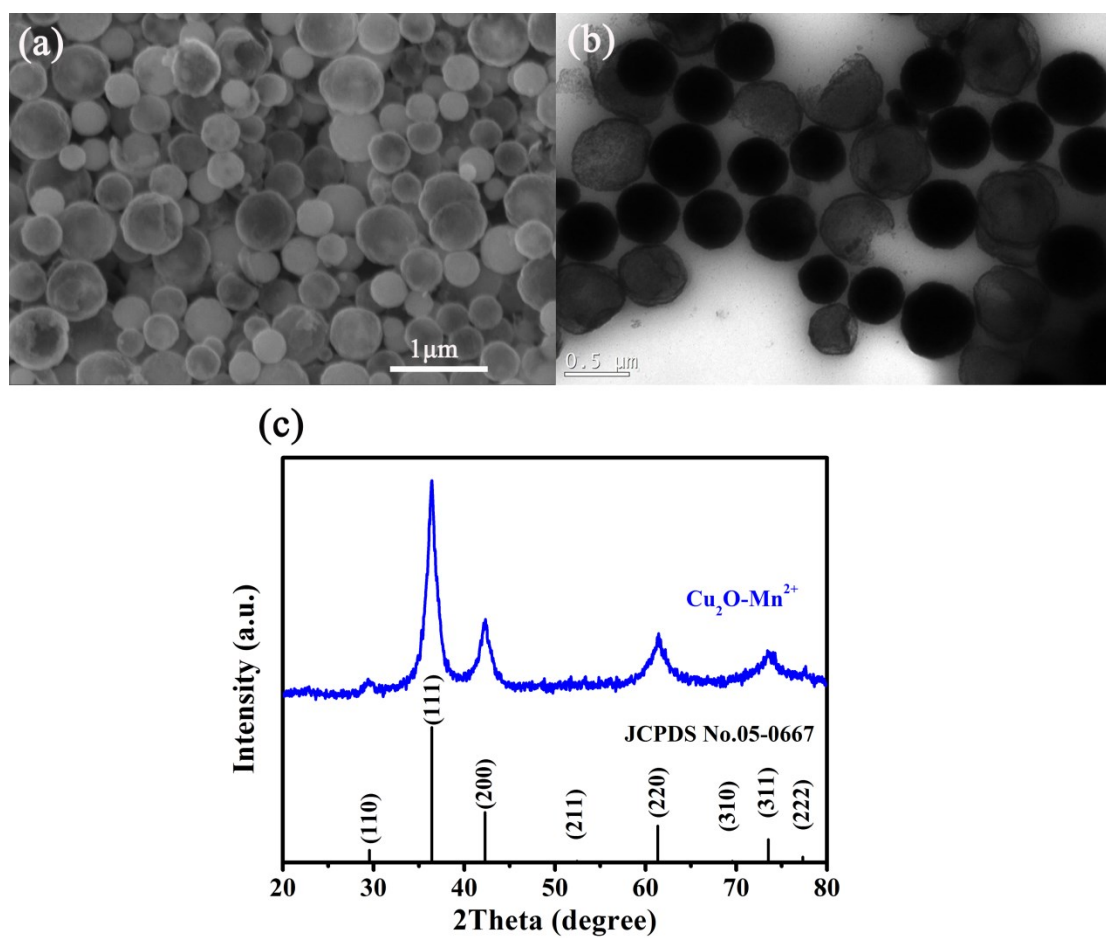

**Figure S5.** Microstructure characterizations of products obtained in the absence of  $\text{Ag}^+$  ions. (a) Low-magnification SEM image; (b) low-magnification TEM image; (c) The corresponding XRD pattern.

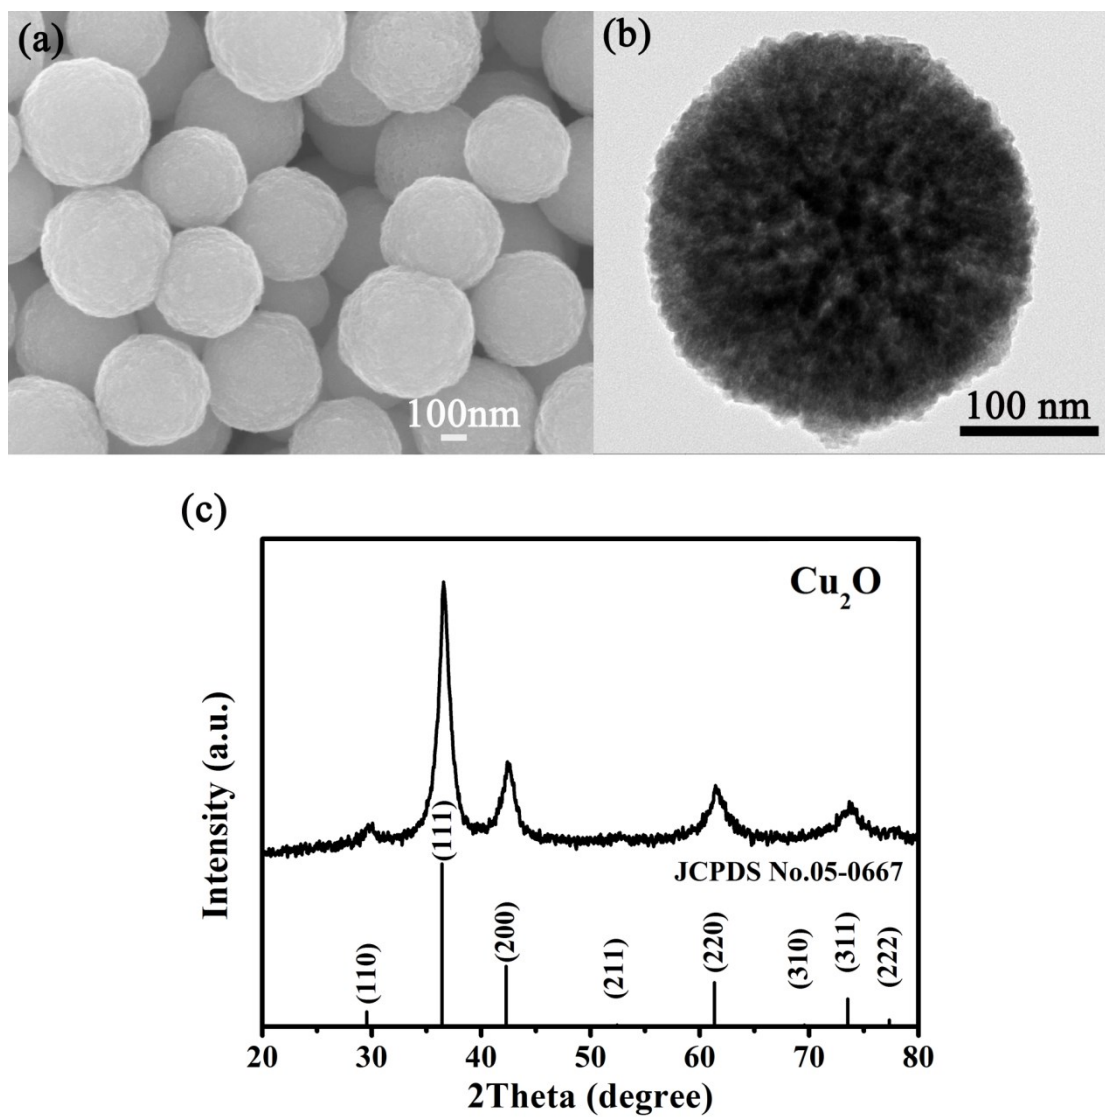

**Figure S6.** Microstructure characterizations of products obtained in the absence of  $\text{Ag}^+$  and  $\text{Mn}^{2+}$  ions. (a) Low-magnification SEM image; (b) low-magnification TEM image; (c) The corresponding XRD pattern.

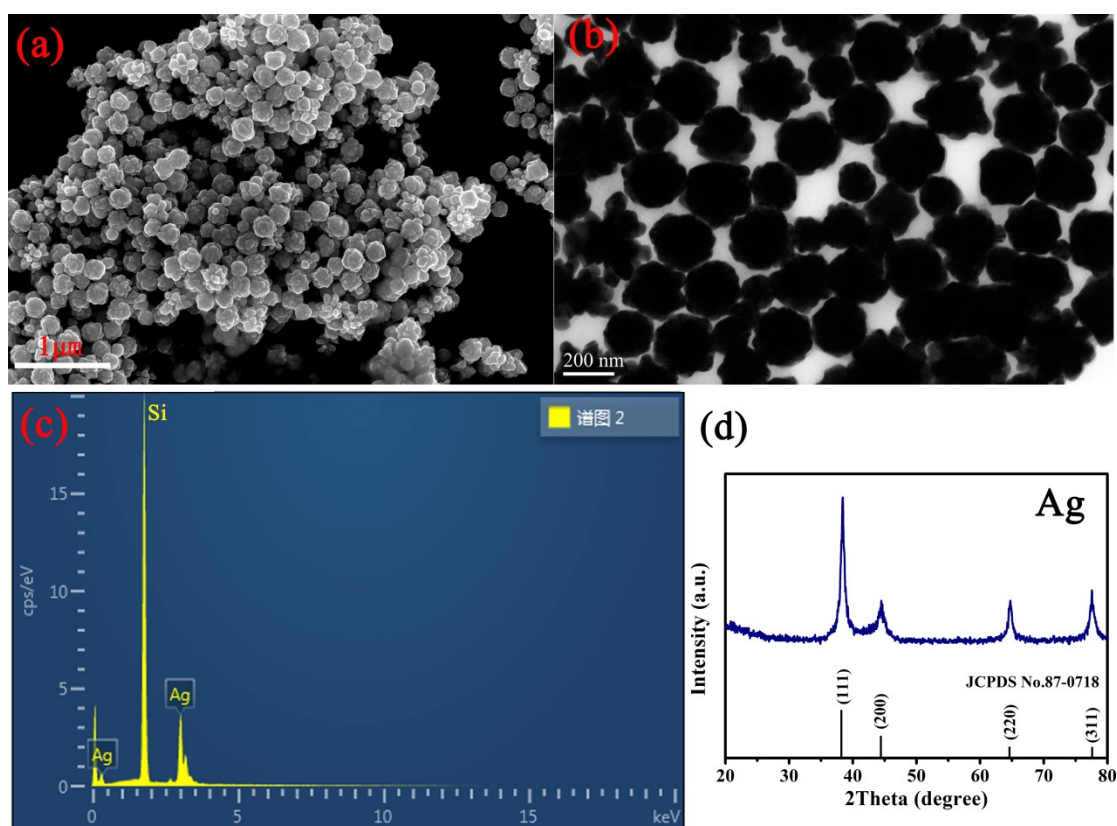

**Figure S7.** Microstructure characterizations of products obtained in the absence of  $\text{Cu}^+$  and  $\text{Mn}^{2+}$  ions. (a) Low-magnification SEM image; (b) low-magnification TEM image; (c) The corresponding EDS pattern; (d) The corresponding XRD pattern.

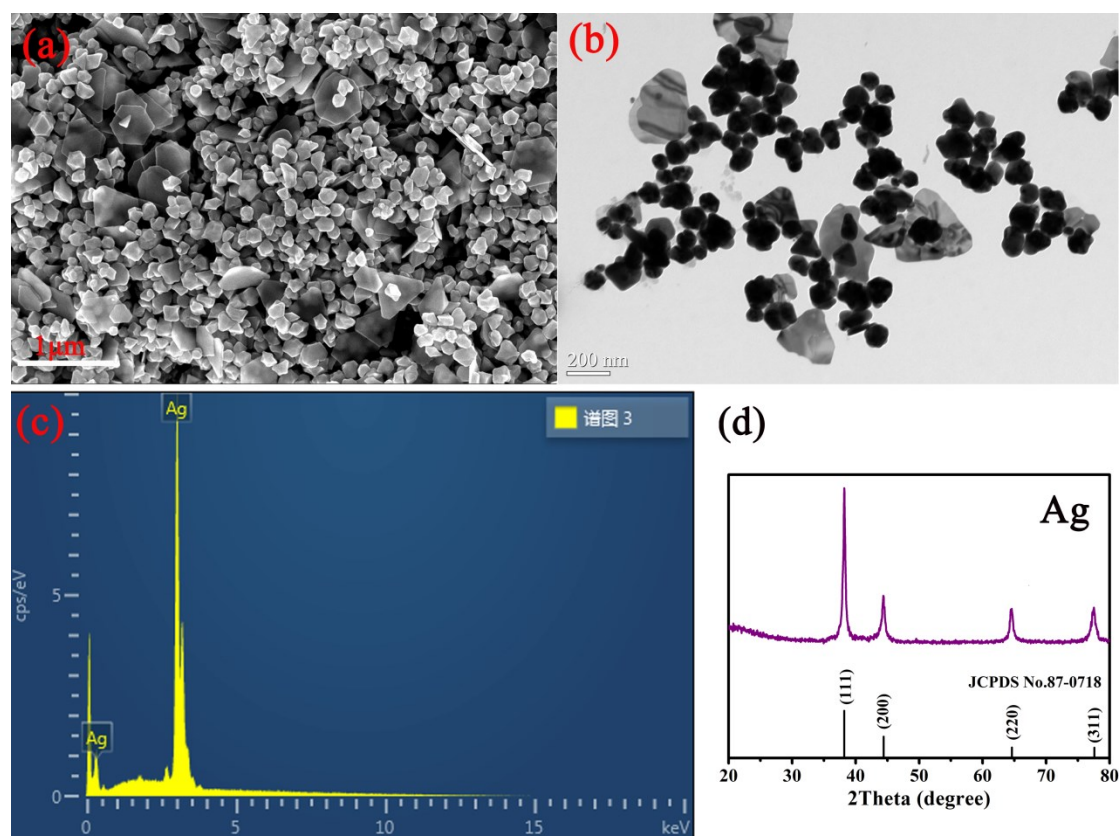

**Figure S8.** Microstructure characterizations of products obtained in the absence of  $\text{Cu}^+$  ions. (a) Low-magnification SEM image; (b) low-magnification TEM image; (c) The corresponding EDS pattern; (d) The corresponding XRD pattern.

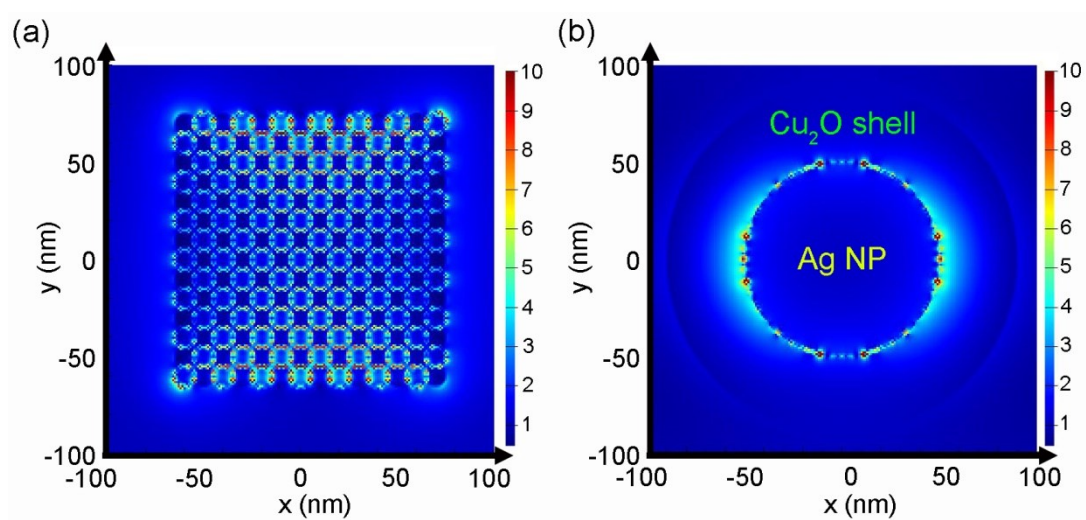

**Figure S9.** The 3D-FDTD simulated electric-field spatial distribution on the x-y plane for (a) Ag-Cu<sub>2</sub>O CMCs, (b) Ag@Cu<sub>2</sub>O core-shell structure, respectively.

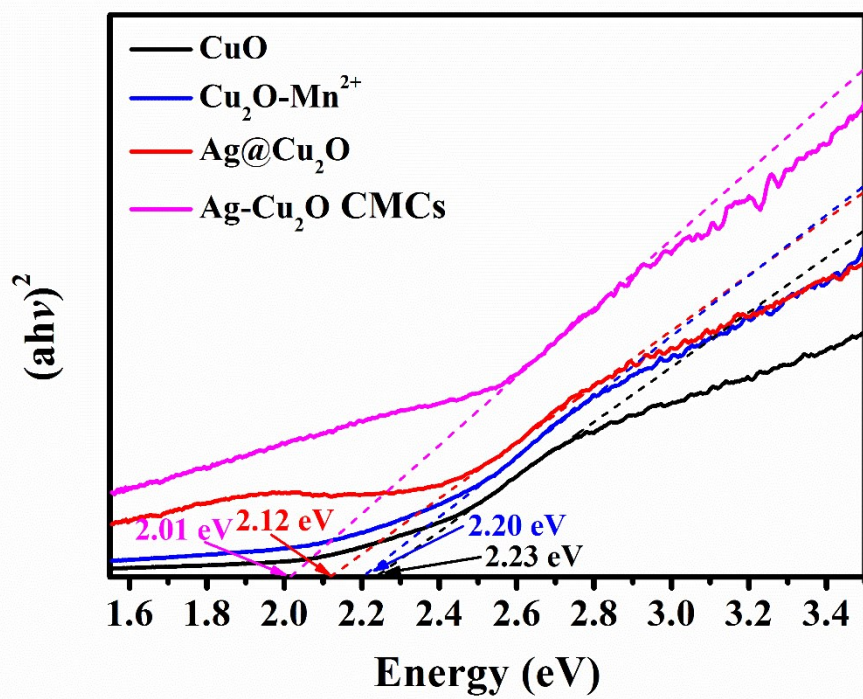

**Figure S10.** The plot of  $(\alpha h\nu)^2$  versus photon energy based on UV-vis DRS spectra.

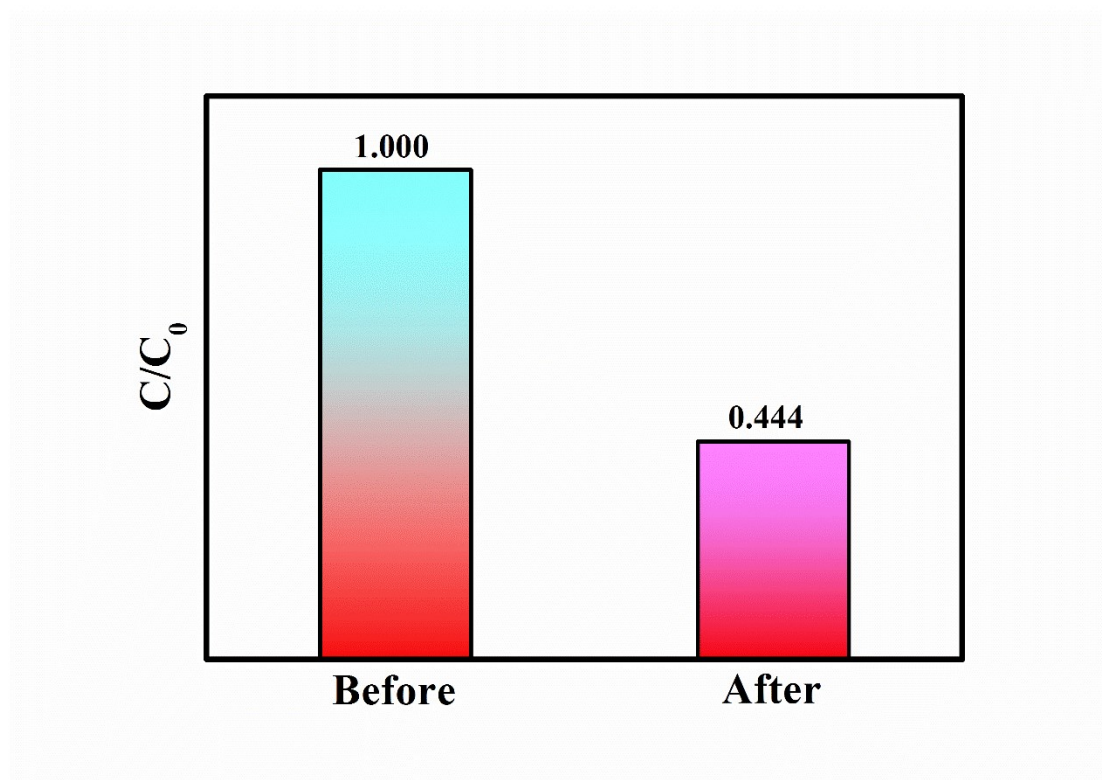

**Figure S11.** For Ag-Cu<sub>2</sub>O CMCs sample, TOC content of TC solution before and after light irradiation for 120 min.

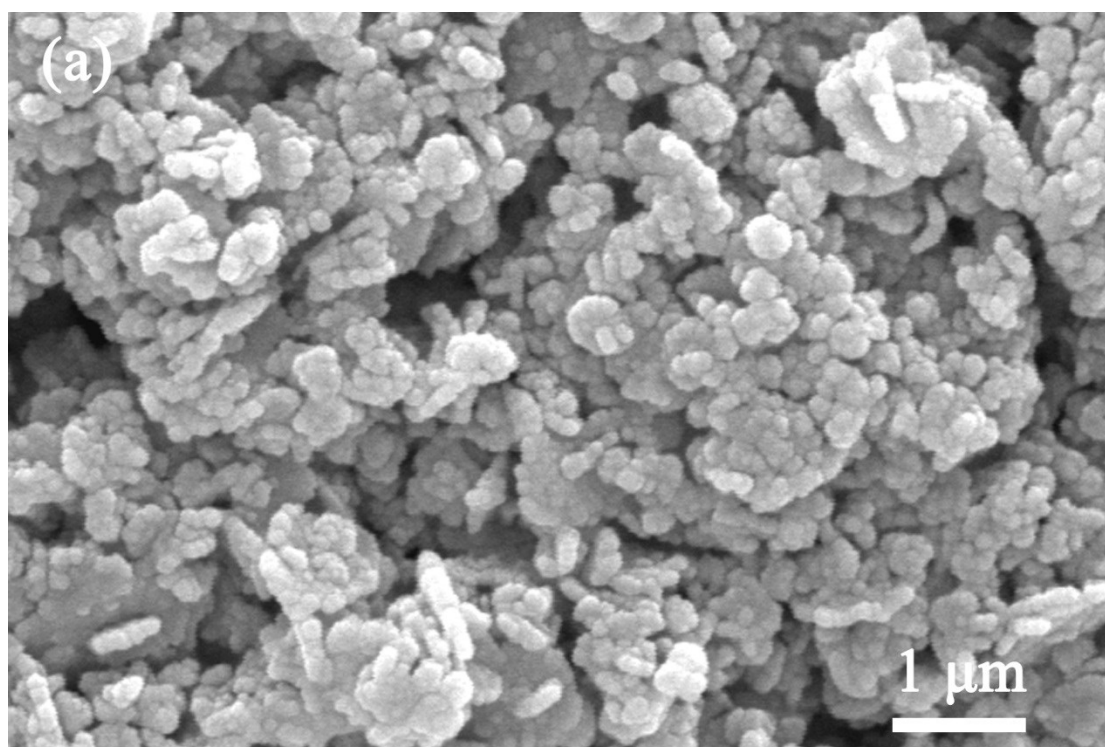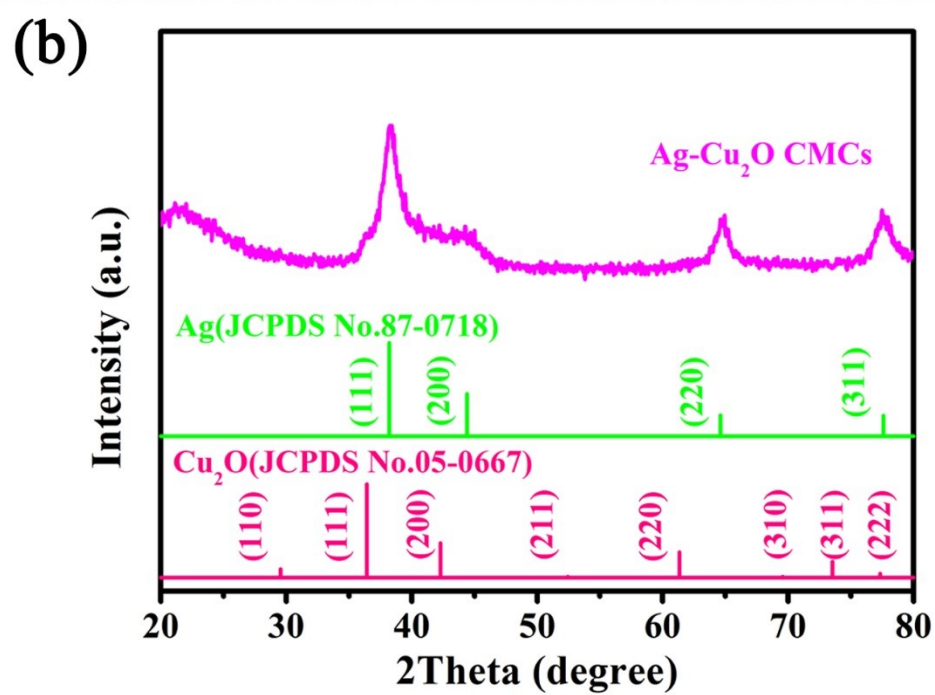

**Figure S12.** (a) SEM image and (b) XRD pattern of the Ag-Cu<sub>2</sub>O CMCs sample after photodegradation of TC solution.

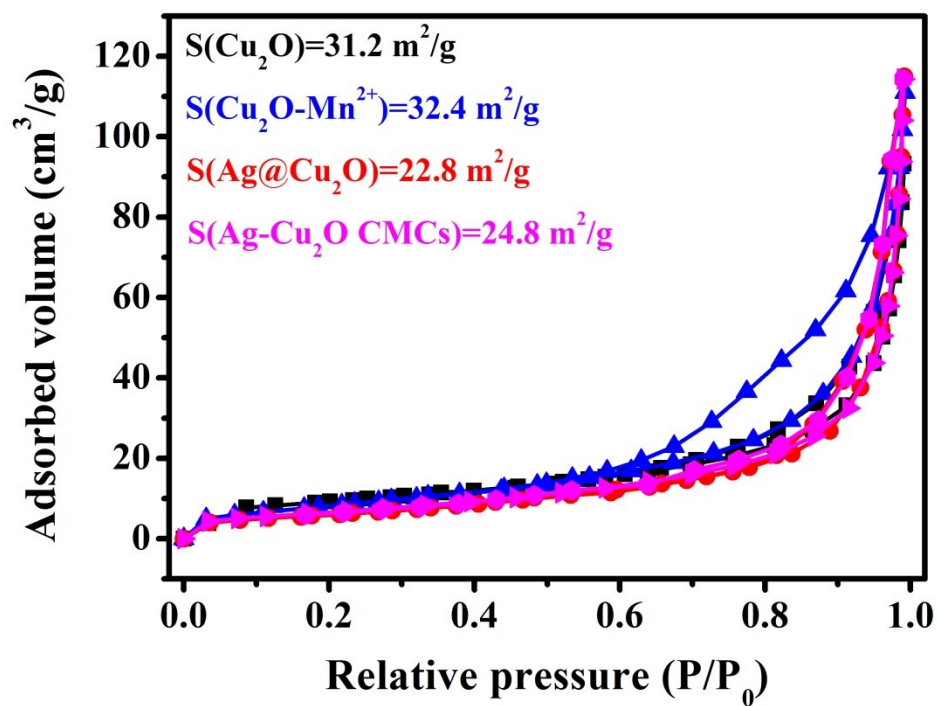

**Figure S13.** Nitrogen gas adsorption-desorption isotherms and BET surface areas of the  $\text{Ag}-\text{Cu}_2\text{O}$  CMCs,  $\text{Ag}@\text{Cu}_2\text{O}$ ,  $\text{Cu}_2\text{O}-\text{Mn}^{2+}$  and  $\text{Cu}_2\text{O}$  samples.
